# Supplementary material for: Electrolyte-controlled discharge product distribution of Na–O2batteries: a combined computational and experimental study
Source: Royal Society of Chemistry journal article supplement (doi:10.1039/c6cp07537a), 2016-12-19
Supplement: c6cp07537a1.pdf [file c6cp07537a1.pdf]

## Electrolyte-controlled discharge product distribution of Na-O<sub>2</sub> battery: A combined computational and experimental study

Beizhou Wang<sup>a,b</sup>, Ning Zhao<sup>a</sup>, Youwei Wang<sup>a</sup>, Wenqing Zhang<sup>\*,a,c</sup>, Wencong Lu<sup>b</sup>,  
Xiangxin Guo<sup>\*,a</sup>, Jianjun Liu<sup>\*,a</sup>

<sup>a</sup>State Key Laboratory of High Performance Ceramics and Superfine Microstructure, Shanghai Institute of Ceramics, Chinese Academy of Sciences, 1295 Dingxi Road, Shanghai 200050, P.R. China.

<sup>b</sup>Department of Chemistry, College of Sciences, Shanghai University, 99 Shangda Road, Shanghai 200444, P.R. China.

<sup>c</sup>Materials Genome Institute, Shanghai University, 99 Shangda Road, Shanghai 200444, P.R. China.

\*Correspondence: [jjliu@mail.sic.ac.cn](mailto:jjliu@mail.sic.ac.cn); [xxguo@mail.sic.ac.cn](mailto:xxguo@mail.sic.ac.cn); [wqzhang@mail.sic.ac.cn](mailto:wqzhang@mail.sic.ac.cn)

### Electronic supplementary information

**Table S1.** Experimental and theoretical equilibrium voltages (V) of Na<sub>2</sub>O, Na<sub>2</sub>O<sub>2</sub> and pyrite NaO<sub>2</sub> at 300 K with respect to solid Na metal and O<sub>2</sub> gas.

| Formation energy                  | This work | Other reports <sup>1</sup> | Experiment <sup>2</sup> |
|-----------------------------------|-----------|----------------------------|-------------------------|
| $\Delta G(\text{Na}_2\text{O})$   | -1.87     | -2.00                      | -1.96                   |
| $\Delta G(\text{Na}_2\text{O}_2)$ | -2.27     | -2.31                      | -2.33                   |
| $\Delta G(\text{pyrite NaO}_2)$   | -2.38     | -2.28                      | -2.26                   |

### Reference

- 1 S. Kang, Y. Mo, S. P. Ong, G. Ceder, *Nano Lett.*, 2014, 14, 1016–1020.
- 2 M. W. Chase, *NIST-JANAF thermochemical tables. 4th ed.*, American Chemical Society; American Institute of Physics for the National Institute of Standards and Technology, Washington, DC, 1998.

**Table S2.** Reaction Free energies of different sodium oxide discharging products.

| Reaction                                                      | $\Delta G(\text{reaction})/\text{eV}$ |
|---------------------------------------------------------------|---------------------------------------|
| $2\text{NaO}_2 + \text{Na} = \text{Na}_3\text{O}_4$           | -2.12                                 |
| $3\text{NaO}_2 + 2\text{Na} = \text{Na}_5\text{O}_6$          | -3.83                                 |
| $\text{NaO}_2 + \text{Na} = \text{Na}_2\text{O}_2$            | -1.95                                 |
| $\text{Na}_3\text{O}_4 + \text{Na} = 2\text{Na}_2\text{O}_2$  | -1.78                                 |
| $3\text{Na}_3\text{O}_4 + \text{Na} = 2\text{Na}_5\text{O}_6$ | -1.30                                 |
| $\text{Na}_5\text{O}_6 + \text{Na} = 3\text{Na}_2\text{O}_2$  | -2.01                                 |
| $\text{Na}_2\text{O}_2 + \text{O}_2 = 2\text{NaO}_2$          | -0.57                                 |
| $\text{Na}_3\text{O}_4 + \text{O}_2 = 3\text{NaO}_2$          | -0.39                                 |
| $\text{Na}_5\text{O}_6 + \text{O}_2 = 5\text{NaO}_2$          | -1.20                                 |

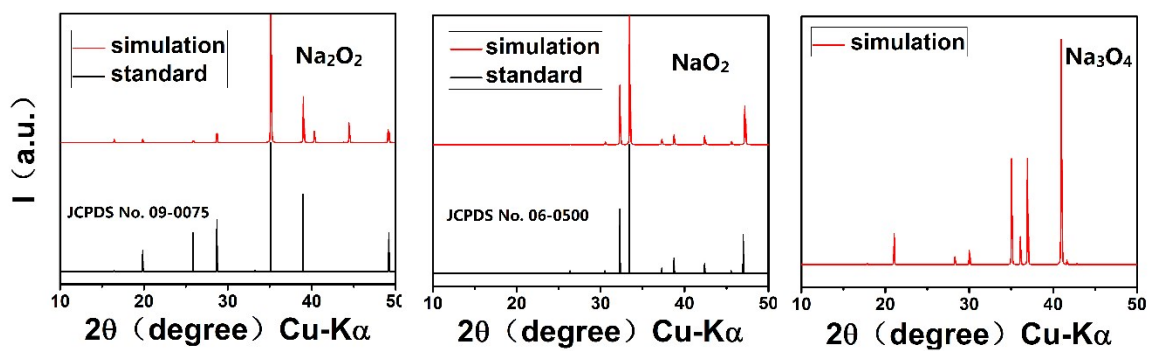

**Figure S1** Computational and experimental XRD characterizations for  $\text{Na}_2\text{O}_2$ ,  $\text{NaO}_2$ , and  $\text{Na}_3\text{O}_4$ . Note that no experimental XRD data was reported.

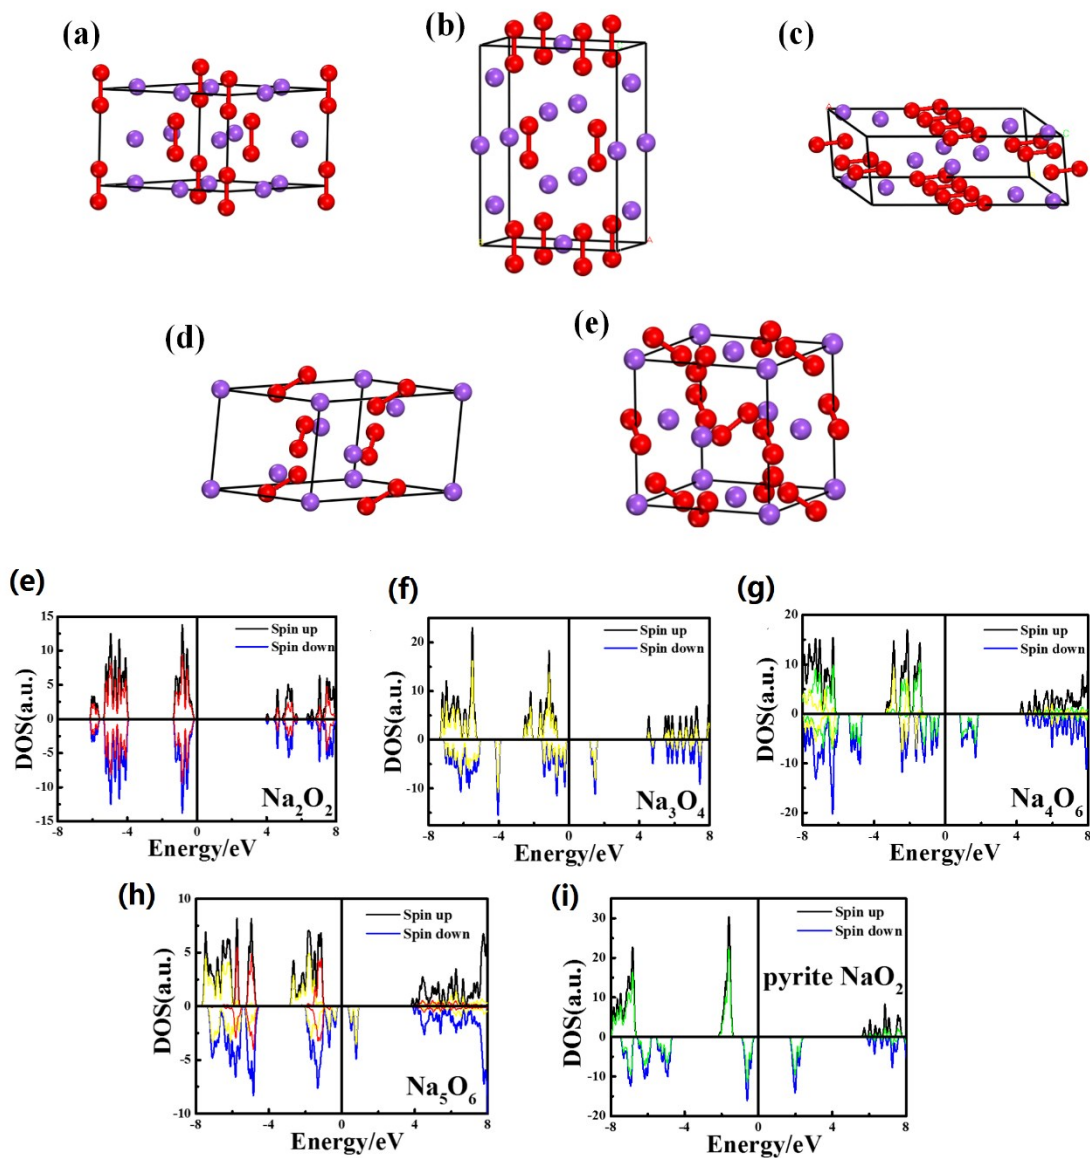

**Figure S2.** Conventional unit cell of (a)  $\text{Na}_2\text{O}_2$ , (b)  $\text{Na}_3\text{O}_4$ , (c)  $\text{Na}_4\text{O}_6$ , (d)  $\text{Na}_5\text{O}_6$  and (e) pyrite  $\text{NaO}_2$ . The purple and red balls represent Na and O atoms, respectively. The bond lengths of O–O in these species are listed in Table 1. HSE-calculated total density of states of (e)  $\text{Na}_2\text{O}_2$ , (f)  $\text{Na}_3\text{O}_4$ , (g)  $\text{Na}_4\text{O}_6$ , (h)  $\text{Na}_5\text{O}_6$  and (i) pyrite  $\text{NaO}_2$ . The red, green and yellow states are the projected DOS of peroxide, superoxide and  $\text{Na}_3\text{O}_4$ -type oxygen atoms

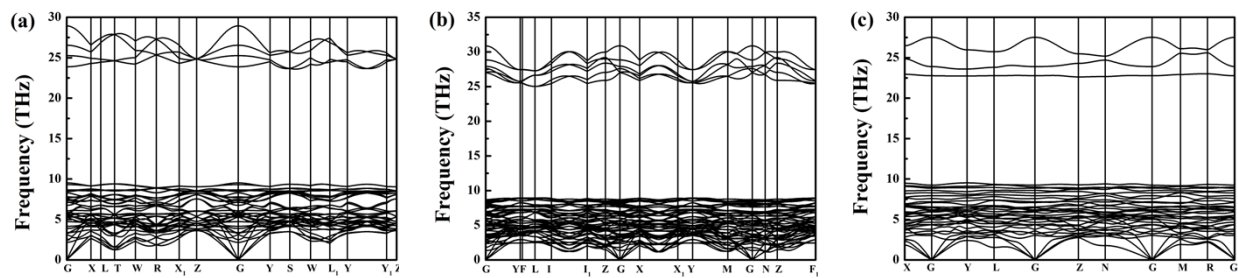

**Figure S3.** Phonon dispersions for (a)  $\text{Na}_3\text{O}_4$ , (b)  $\text{Na}_4\text{O}_6$  and (c)  $\text{Na}_5\text{O}_6$ .

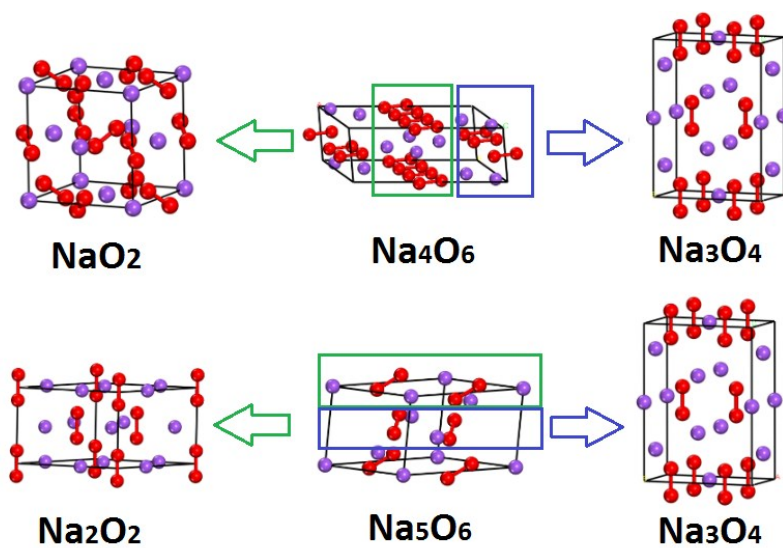

**Figure S4.** The structural similarity analysis of  $\text{O}_2^n$ -anions in  $\text{Na}_4\text{O}_6$  and  $\text{Na}_5\text{O}_6$  by compared with  $\text{NaO}_2$ ,  $\text{Na}_2\text{O}_2$ , and  $\text{Na}_3\text{O}_4$ .

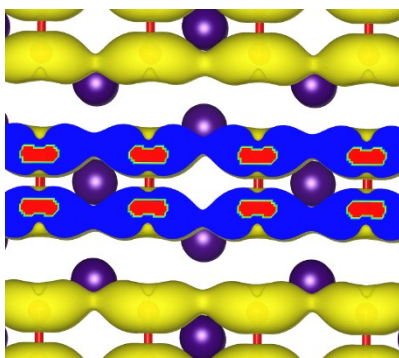

**Figure S5.** Partial charge density plot around Fermi level of Na<sub>3</sub>O<sub>4</sub> (isosurface value of 0.005 eV).

**Table S3.** Calculated Surface Energies of the Low-Index Surfaces of  $\text{Na}_2\text{O}_2$ ,  $\text{Na}_3\text{O}_4$ ,  $\text{Na}_5\text{O}_6$  and Pyrite  $\text{NaO}_2$  under the Most Oxidizing and Reducing Conditions (in  $\text{meV}/\text{\AA}^2$ )

| species                 | orientation | most oxidizing condition | most reducing condition |
|-------------------------|-------------|--------------------------|-------------------------|
| $\text{Na}_2\text{O}_2$ | (0001)      | 24.0                     | 36.6                    |
|                         | (010)       | 24.4                     | 40.1                    |
|                         | (110)       | 24.2                     | 29.9                    |
|                         | (100)       | 24.3                     | 40.1                    |
| $\text{Na}_3\text{O}_4$ | (010)       | 19.6                     | 37.8                    |
|                         | (100)       | 42.5                     | 42.5                    |
|                         | (001)       | 3.4                      | 11.8                    |
|                         | (00)        | 42.4                     | 42.4                    |
|                         | (10)        | 21.3                     | 22.3                    |
| $\text{Na}_5\text{O}_6$ | (001)       | 15.8                     | 14.0                    |
|                         | (101)       | 32.5                     | 27.4                    |
|                         | (011)       | 15.6                     | 12.5                    |
|                         | (010)       | 19.3                     | 18.2                    |
|                         | (100)       | 32.8                     | 33.3                    |
| pyrite $\text{NaO}_2$   | (100)       | 2.4                      | 2.4                     |
|                         | (110)       | 10.1                     | 10.1                    |
|                         | (111)       | 1.7                      | 6.5                     |



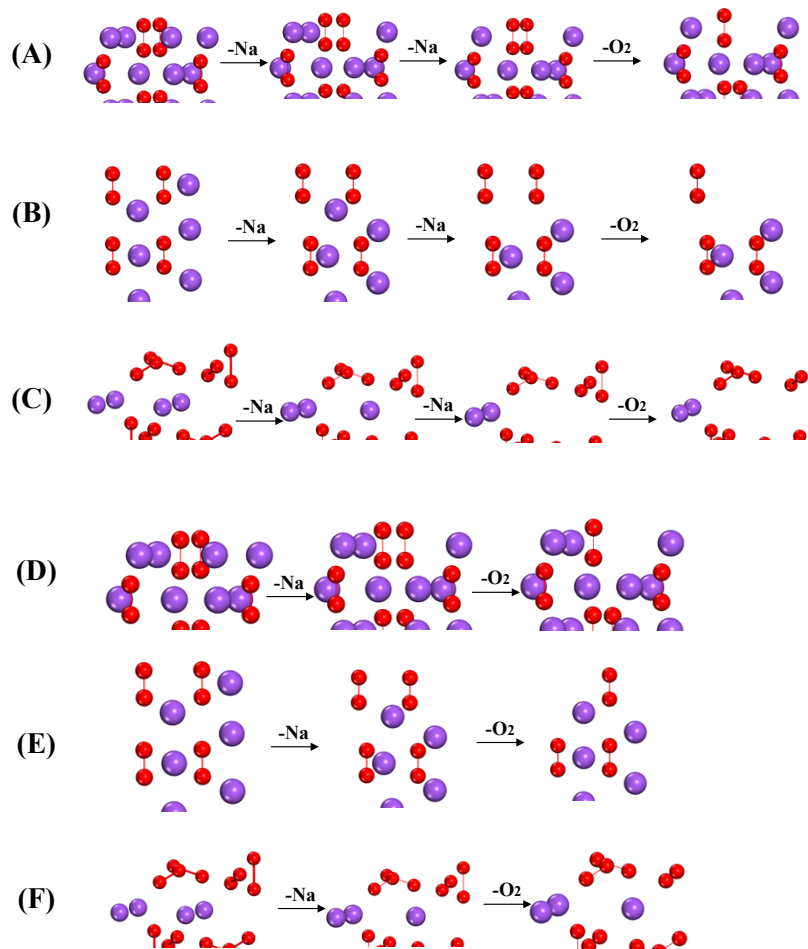

**Figure S6.** Structural evolution corresponding to  $\text{Na}^+ \rightarrow \text{Na}^+ \rightarrow \text{O}_2$  reaction paths on the (0001) surface of  $\text{Na}_2\text{O}_2$  (A), the (001) surface of  $\text{Na}_3\text{O}_4$  (B) and the (111) surface of  $\text{NaO}_2$  (C) and Structural evolution corresponding to  $\text{Na}^+ \rightarrow \text{O}_2$  OER paths on the (0001) surface of  $\text{Na}_2\text{O}_2$  (D), the (001) surface of  $\text{Na}_3\text{O}_4$  (E) and the (111) surface of  $\text{NaO}_2$  (F). Different kinds of elements are represented by different colors in that: Sodium (purple), Oxygen (red).

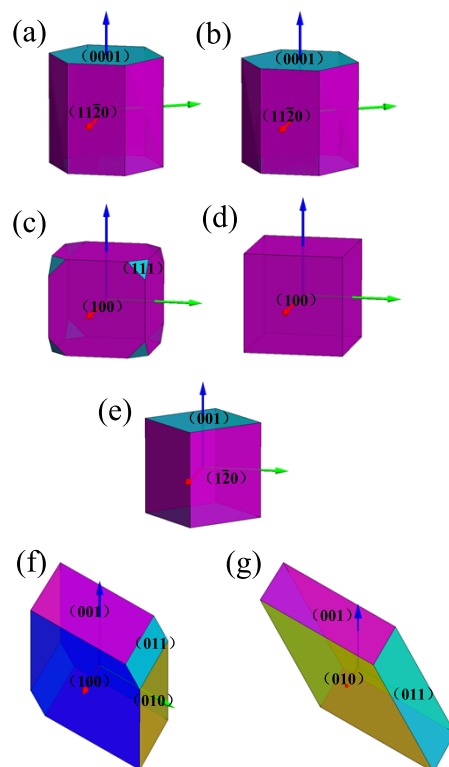

**Figure S7.** Wulff Shapes of (a), (b)  $\text{Na}_2\text{O}_2$ , (c), (d) pyrite  $\text{NaO}_2$  and (e)  $\text{Na}_3\text{O}_4$ , (f), (g)  $\text{Na}_5\text{O}_6$  during the OER on the corresponding surfaces. The left side (a), (c) and (f) are for the most oxidizing conditions, and the right side (b), (d) and (g) are for the most reducing conditions for each product. The lower-middle (e) is for both the most oxidizing and reducing conditions for  $\text{Na}_3\text{O}_4$ .
